1 **Original Article**

2

3 **Potential involvement of root auxins in drought tolerance by modulating nocturnal and**  
4 **daytime water use in wheat**

5

6

7

8 Walid Sadok<sup>1,\*</sup>, Rémy Schoppach<sup>1,2</sup>

9

10

11 <sup>1</sup>Department of Agronomy and Plant Genetics, 1991 Upper Buford Circle, 411 Borlaug Hall,

12 University of Minnesota, St. Paul, MN 55108-6026, USA

13 <sup>2</sup>Earth and Life Institute, Université Catholique de Louvain, Louvain-la-Neuve 1348, Belgium

14

15 Running Title: Root auxin associated with nocturnal and daytime water-saving traits

16

17 \*For correspondence. Email: [msadok@umn.edu](mailto:msadok@umn.edu)

18

19

## 1 **Abstract**

2 The ability of wheat genotypes to save water by reducing their transpiration rate (TR) under  
3 times of the day with high vapour pressure deficit (VPD) has been linked to increasing yields in  
4 terminal drought environments. Further, recent evidence shows that reducing nocturnal  
5 transpiration ( $TR_N$ ) could amplify water-saving. Previous research indicates that such traits  
6 involve a root-based hydraulic limitation, but the contribution of hormones, particularly auxin  
7 and abscisic acid (ABA) has not been explored to explain the shoot-root link. In this  
8 investigation, based on physiological, genetic and molecular evidence gathered on a mapping  
9 population, we hypothesized that root auxin accumulation regulates whole-plant water use during  
10 both times of the day. Eight double-haploid lines were selected from a mapping population  
11 descending from two parents with contrasted water-saving strategies and root hydraulic  
12 properties. These spanned the entire range of slopes of TR responses to VPD and  $TR_N$   
13 encountered in the population. On those lines, we examined daytime/night-time auxin and ABA  
14 contents in the roots and the leaves in relation to hydraulic traits that included whole-plant TR,  
15 plant hydraulic conductance ( $K_{Plant}$ ), slopes of TR responses to VPD and leaf-level anatomical  
16 traits. Root auxin levels were consistently genotype-dependent in this group irrespective of  
17 experiments and times of the day. Daytime root auxin concentrations were found to be strongly  
18 and negatively correlated with daytime TR,  $K_{Plant}$  and the slope of TR response to VPD. Night-  
19 time root auxin levels significantly and negatively correlated with  $TR_N$ . In addition, daytime and  
20 night-time leaf auxin and ABA concentrations did not correlate with any of the examined traits.  
21 The above results indicate that accumulation of auxin in the root system reduces daytime and  
22 night-time water use and modulates plant hydraulic properties to enable the expression of water-  
23 saving traits that have been associated with enhanced yields under drought.

24

25

26

## 27 **Keywords (3 to 12)**

28 Drought tolerance, water-saving, transpiration rate, nocturnal, nighttime, auxin, abscisic acid,  
29 root hydraulics, vasculature, wheat, yield

30

## 1 INTRODUCTION

2 Mediterranean-type terminal drought events are the most penalizing water deficit regimes  
3 experienced by crops and their frequency and intensity is expected to increase across the globe as  
4 a result of anthropogenic climate change (Berger *et al.*, 2016). Under such conditions, plants  
5 typically grow on stored soil moisture, following early-season precipitation which typically  
6 triggers planting from the farmer. In those environments, plants will have to achieve a seed-to-  
7 seed cycle by relying on an amount of stored soil water that did not evaporate, runoff or  
8 percolate to deeper, inaccessible soil layers. For subsistence farming, the situation is even more  
9 challenging since the crop will have to generate yields that have to be economically viable for  
10 the household (Solh and Van Ginkel, 2014).

11 Water-saving traits have a promising potential for enhancing yields under terminal  
12 drought environment (e.g., Sinclair *et al.*, 2017). Over the last decade, a series of simulation  
13 studies using physiologically-informed, process-based simulation modelling consistently  
14 demonstrated for several crops such as maize (*Zea mays* (L.)), soybean (*Glycine max* (L.) Merr.)  
15 and lentil (*Lens culinaris* (Medik.)) that the expression of such traits would translate into in  
16 increased probability of significant yields benefits (e.g., Sinclair *et al.*, 2010; Messina *et al.*,  
17 2015; Guiguitant *et al.*, 2017). In those studies, a functional trait that was found to consistently  
18 generate yield benefits under terminal drought consisted in decreased transpiration rates (TR)  
19 during times of the day where the levels of atmospheric vapour pressure deficit (VPD) would  
20 outmatch the ability of the plant to supply water to the transpiring leaf, resulting in a decrease in  
21 canopy conductance (Sinclair *et al.*, 2005; Sinclair *et al.*, 2017).

22 On wheat (*Triticum aestivum* (L.)), such trait has been shown to be consistently  
23 expressed among historical genotypes released for the rain-fed production environments in  
24 Australia between 1890 and 2008 (Schoppach *et al.*, 2017). Experimentation carried out on an  
25 elite, drought-tolerant Australian breeding line 'RAC875' showed that this water-saving  
26 behaviour was stemming from a lower root hydraulic conductivity that was not exhibited by a  
27 drought-sensitive check cultivar called Kukri (Schoppach *et al.* 2012; Schoppach *et al.* 2014a).  
28 This difference was traced to an increased resistance to radial, trans-membrane water movement  
29 in the roots of RAC875, putatively controlled by a lack of a mercury-sensitive aquaporin  
30 population (Schoppach *et al.*, 2014a). In addition, the roots of RAC875 were found to exhibit  
31 particularly smaller diameters of central metaxylem (CMX) vessels, below a limit (55  $\mu\text{m}$ ) that

1 was found by Richards and Passioura (1989) to be associated with up to 11% of yield  
2 increases in a breeding program that specifically targeted decreasing CMX diameters to achieve  
3 water-saving in the field in Australia.

4         Currently, there is evidence supporting the idea that whole-plant TR response to VPD  
5 involves an interaction between ‘local’ (i.e., leaf-based) and ‘non-local’ (root-based)  
6 mechanisms mobilizing long-distance hydraulic signals that involve a combination of root  
7 anatomical traits and a dynamic control over radial water flow mediated by aquaporins  
8 (Vandeleur *et al.*, 2014; Vadez, 2014; Maurel *et al.*, 2016; Sivasakthi *et al.*, 2017). However,  
9 other investigations point to a role played by a shoot-to-root hormonal signal, namely abscisic  
10 acid (ABA) in coordinating TR with root hydraulic conductivity in response to increasing VPD  
11 (Kudoyarova *et al.*, 2011; Veselov *et al.*, 2018).

12         In an effort to illuminate clues underpinning these links, a high-throughput phenotyping  
13 approach for characterizing TR response curves to naturally increasing VPD was undertaken in a  
14 double-haploid (DH) mapping population resulting from a cross between RAC875 and Kukri  
15 (Schoppach *et al.*, 2016). The genetic analysis revealed a major QTL controlling these responses,  
16 which explained more than 25% of the genetic variance, with a peak region that was mapped to 9  
17 drought-tolerance candidate genes that were found to be expressed in the roots independent from  
18 phenology, in a RNA-Seq experiment (Schoppach *et al.*, 2016). In further support of the root-  
19 based origin of these responses, the putative functions of several of those genes directly indicated  
20 their involvement in root development, root xylem patterning and response to ABA and water  
21 stress. However, an unexpected finding of that study was that several of the genes were also  
22 auxin-related, raising the speculation that root auxin could be directly involved in the variation in  
23 TR responses to VPD found in this population.

24         Considering evidence documenting direct involvement of auxin i) in root development  
25 and vasculature patterning (Fàbregas *et al.*, 2015; Alabdallah *et al.*, 2017), ii) in down-regulating  
26 aquaporin (AQP) expression and hydraulic conductivity (Péret *et al.*, 2012) and iii) as a shoot-  
27 root signalling molecule (Vandeleur *et al.*, 2014), a first goal of this research was to examine the  
28 involvement of root auxin levels in variation of traits associated with TR responses to VPD. To  
29 this end, we examined the relationship between root auxin concentrations and variation in whole-  
30 plant hydraulic conductance, daytime TR and TR response curves to increasing VPD among a

1 group of 8 DH lines from the RAC875 x Kukri cross, which previously expressed variation in  
2 canopy conductance spanning the entire range of the population.

3 A second goal of the investigation was to evaluate two alternative, competing hypotheses  
4 to the direct involvement of root auxin in regulating whole-plant hydraulics in wheat. The first  
5 alternative hypothesis is based on the idea that leaf auxin could be involved in regulating those  
6 hydraulic traits. Considering findings documenting the role played by leaf auxins in leaf  
7 vasculature development, particularly xylem (Taneda and Terashima, 2012; Moreno-Piovanio *et*  
8 *al.*, 2017) and given that leaf vasculature plays a central role in leaf hydraulic conductance  
9 (Caringella *et al.*, 2015), we examined the relationship between leaf auxin concentrations, the  
10 above hydraulic traits, and a group of six vasculature-related, leaf anatomical traits. The second  
11 alternative hypothesis consisted of the involvement of shoot and/or root ABA in regulating those  
12 traits. Such possibility is supported by findings of Kudoyarova *et al.* (2011) on durum wheat and  
13 Veselov *et al.* (2018) on barley, indicating that high VPD triggers leaf ABA export to the root to  
14 regulate root hydraulic conductivity, as a way to maintaining leaf hydration as increases. In  
15 contrast, the findings of Kholová *et al.* (2010) on pearl millet indicate a localized phenomenon  
16 where the accumulation of leaf ABA under high VPD drives a decrease in stomata conductance  
17 and therefore the expression of water-saving of drought-tolerant genotypes. To address these  
18 hypotheses, another goal of the investigation was to examine the relationships between root and  
19 leaf ABA and whole-plant hydraulic conductance, daytime TR and TR response curves to  
20 increasing VPD among the same eight lines selected from the RAC875 x Kukri population.

21  
22 In addition to traits controlling daytime water use, there is indirect evidence to suggest  
23 potential yield benefits arising from reduced nocturnal transpiration in crops grown in drought-  
24 prone environments. In the case of Australian wheat, Rawson and Clarke (1988) found that  
25 night-time transpiration rates ( $TR_N$ ) could be in excess of 0.5 mm per night, first hypothesizing  
26 potential yield benefits resulting from night-time water-saving. This potential was confirmed in a  
27 series of studies on crops including wheat (Schoppach *et al.*, 2014b) bean (Resco de Dios *et al.*,  
28 2015) and grapevine (Coupel-Ledru *et al.*, 2016). Under controlled environment conditions,  
29 Schoppach *et al.*, (2014b) identified significant genotypic variability in wheat  $TR_N$ , which was  
30 driven by nocturnal VPD, reaching values that were up to 55% of maximal daytime TR, under  
31 high levels of nocturnal VPD (2.1 kPa). Interestingly, those responses were found to mirror

1 daytime TR response curves to VPD, in that the water-saving genotype RAC875 also exhibited a  
2 particularly limited  $TR_N$  under high nocturnal VPD, in contrast to the drought-sensitive cultivar  
3 Kukri. More recently, Claverie *et al.* (2018) found that under water-deficit conditions,  $TR_N$  in  
4 wheat was much less sensitive to progressive soil drying relative to daytime TR, resulting in a  
5 progressively higher contribution of  $TR_N$  to daily water use. In that study, RAC875 was found to  
6 exhibit a tighter control of  $TR_N$  than Kukri during the soil drying sequence, resulting in the  
7 expression of what could result in a water-saving behaviour (Claverie *et al.*, 2018).

8 While the genetic basis of  $TR_N$  was found to be controlled by numerous QTL in the  
9 RAC875 x Kukri population (Schoppach *et al.*, 2016), the physiological basis driving this  
10 variation remains poorly understood. On well-watered wheat, Claverie *et al.* (2016) found that  
11 high  $TR_N$  levels were associated with changes in root anatomy, particularly smaller endodermis  
12 cell size and reduced xylem sap exudation rates, a proxy measure for root pressure. On trees,  
13 high  $TR_N$  levels have been associated with higher N uptake by the roots to compensate for low N  
14 availability (Rohula *et al.*, 2014), or with the need for higher  $O_2$  delivery via the nocturnal xylem  
15 sap to maintain functions sustained via dark respiration (Marks and Lechowicz, 2007). However,  
16 so far, hormonal involvement in regulating  $TR_N$  was not explored. Given the involvement of root  
17 auxin in regulating root vasculature development (Fàbregas *et al.*, 2015; Alabdallah *et al.*, 2017),  
18 and nitrogen foraging by the roots (Song *et al.*, 2013), we examined in this investigation the  
19 relationship between root auxin concentration and  $TR_N$  levels among the same 8 DH lines from  
20 the RAC875 x Kukri cross. Similar to the first goal of this investigation, we also tested the  
21 hypothesis of the involvement of night-time leaf auxin levels and leaf anatomical traits in  
22 controlling  $TR_N$ . Finally, we examined the possibility that night-time leaf or root ABA could be  
23 involved in the variation in  $TR_N$  in this group.

24

25

## 26 MATERIALS AND METHODS

27

### 28 *Genetic material*

29 Eight genotypes were selected from a population of 143 bread wheat (*Triticum*  
30 *aestivum* (L.)) double haploid lines that descended from a cross between the drought-tolerant  
31 breeding line RAC875 (RAC655/3/Sr21/4\*LANCE//4\*BAYONET) and the check, drought-

1 sensitive cultivar Kukri (76ECN44/76ECN36//MADDEN/6\*RAC177). The 8 genotypes were  
2 selected such that they span the entire range of the slopes of TR response curves to increasing  
3 VPD that was found for this population (Schoppach *et al.*, 2016; [Supplementary Data Fig.  
4 S1]).

5

#### 6 *Growth conditions*

7 Four independent experiments were undertaken in this study (Table 1). In all  
8 experiments, plants were grown for 34-37 days in a glasshouse at the Université catholique de  
9 Louvain, Belgium (50°40'N, 4°36'E). The glasshouse was equipped with a supplementary LED  
10 lighting system (Pro650, LumiGrow, Novato, California, USA), which provided an additional  
11 photosynthetic photon flux density (PPFD) of 200  $\mu\text{mol m}^{-2} \text{s}^{-1}$  to the natural ambient PPFD at  
12 canopy level. The lighting system activated each time the incident radiation dropped below 500  
13  $\text{W m}^{-2}$  between 0600 h am and 2200 h in experiments E1 and E2 and 0800 h and 2000 h in  
14 experiment E3. Plants were sown and grown in well-watered garden soil (DCM Corporation,  
15 Grobendonk, Belgium) in experiment E1 and in a hydroponic system in experiments E2 and E3  
16 (see below for details).

17 Potted plants were grown as described in Schoppach *et al.* (2016). Briefly, three seeds per  
18 pot were sown at a depth of 2.5 cm in custom-made PVC columns (0.11 m diameter and 0.33 m  
19 tall) filled with  $1205 \pm 5$  g of garden soil. Ten days after sowing, each pot was thinned to a single  
20 plant. Pots were watered regularly until the measurements (hydraulic conductance, see below)  
21 were initiated. Hydroponically-grown plants (E2 and E3) were grown as in Schoppach *et al.*  
22 (2014a) with the exception that plant growth took place in the same greenhouse and under  
23 relatively similar conditions as the potted plants (Table 1). Seeds were germinated for 3 days in  
24 petri dishes on a layer of filter paper humidified with ultra-pure water, inside a dark climate  
25 cabinet where temperature (T) was maintained at 20 °C. The germinated seeds were  
26 subsequently placed on expanded polystyrene plates (30 plants per plate) floating on a nutrient  
27 solution that filled 26-L plastic tanks. The solution was regularly aerated by means of an  
28 automatic pump system (flow rate: 150 L/h, for 15 min every hour) and was prepared based on  
29 the method described by Rengel and Graham (1996). This solution contained: 2mM  $\text{Ca}(\text{NO}_3)_2$ ,  
30 0.5mM  $\text{MgSO}_4 \cdot 7\text{H}_2\text{O}$ , 1.5mM  $\text{KNO}_3$ , 0.1mM  $\text{KCl}$ , 2mM  $\text{MES-KOH}$ , 0.1mM  $\text{NH}_4\text{H}_2\text{PO}_4$ ,  
31 10mM  $\text{H}_3\text{BO}_3$ , 0.1 mM  $\text{Na}_2 \text{MoO}_4$ , 25mM  $\text{K}_3\text{-(N-(2-hydroxyethyl) ethylenedinitrilotriacetic}$

1 acid) (HEDTA), 0.1mM FeHEDTA, 1 mM MnHEDTA, 0.5 mM CuHEDTA, 0.1 mM NiHEDTA,  
2 2 mM ZnHEDTA. During the first 6 days, seedlings were grown in a half-strength nutrient  
3 solution. The solutions were replaced every week. The pH of the nutrient solution was checked  
4 daily and when necessary adjusted to a value of 6 using MES-KOH. During all experiments, T  
5 and relative humidity (RH) conditions were continuously recorded every five minutes by pocket  
6 sensors connected to USB dataloggers (EL-USB-2-LCD, Lascar Electronics, Whiteparish,  
7 United Kingdom) placed in 3-5 locations across the setup.

### 8 9 *Plant hydraulic conductance*

10 This experiment (E1) was carried out on the potted plants (Table 1). On the day prior to  
11 the measurements, three replicate plants per genotype (i.e., a total of 24 pots) were watered to  
12 dripping at 1600 h. They were slightly re-watered again on the following morning around 0500 h  
13 to minimize the occurrence of transient soil moisture deficit during the measurements.

14 Afterwards, the soil in each pot was covered with an aluminium foil to nullify direct soil water  
15 evaporation. The plants were then placed inside a walk-in growth chamber (PGV36, Conviron,  
16 Winnipeg, Manitoba, Canada) and left to acclimate for 6 hours under the steady-state conditions  
17 Photosynthetic Photon Flux Density (PPFD) = 480  $\mu\text{mol m}^{-2} \text{s}^{-1}$ , T = 31.9 °C, VPD = 2.8 kPa,  
18 Table 2).

19 Following the acclimation period, whole-plant TR values were determined for all 8 lines  
20 by performing 2 weightings separated by 60 min, using an electronic balance with a resolution of  
21 0.01 g (Model Fx-3000i, A&D Co. Ltd, Tokyo, Japan). TR ( $\text{mg H}_2\text{O m}^{-2} \text{s}^{-1}$ ) was later calculated  
22 as the difference in pot mass, normalized by whole plant leaf area which was measured  
23 destructively, using a leaf area meter (LI- 3100C, Li-Cor, Lincoln, NE, USA). Leaf water  
24 potential ( $\psi_{\text{leaf}}$ ) of the uppermost fully developed leaf was measured using a standard pressure  
25 chamber (Scholander 670, OMS Instrument, Albany, USA). Whole plant conductance ( $K_{\text{Plant}}$ )  
26 was defined as the flux of water through the plant (TR), divided by the water potential gradient  
27 between the soil ( $\psi_{\text{soil}}$ ) and the top leaf ( $\psi_{\text{leaf}}$ ), as follows:

28  
29 
$$K_{\text{Plant}} = \text{TR} / (\psi_{\text{soil}} - \psi_{\text{leaf}})$$

30



1 Since the pots were well-watered, it was assumed that  $\square_{\text{soil}}$  is approaching 0 MPa. Consequently,  
2 the unit of K is:  $\text{mg H}_2\text{O leaf area m}^{-2} \text{ s}^{-1} \text{ MPa}^{-1}$ .

3

#### 4 *Auxin and abscisic acid measurements*

5 *Tissue harvest conditions:* Measurements were carried out on hydroponically-grown  
6 plants (E2 and E3, Table 1). Prior to measurements, all plants measured in E2 and E3 were  
7 cautiously removed from the polystyrene plates at the end of the afternoon and transferred into  
8 individual 300-mL dark brown glass bottles covered with aluminium foil and filled with a fresh  
9 hydroponic solution at 2000 h. Plants were then placed in the glasshouse at a PPFD of  $0 \mu\text{mol m}^{-2}$   
10  $\text{s}^{-1}$  under the environmental conditions displayed in Table 2.

11 Nocturnal auxin (indole-3-acetic acid or IAA) and ABA measurements were made on  
12 leaf and root tissues (4 replicate plants per genotype) sampled at 0400 h in experiment E2 and at  
13 two times of the night (E3.1: 0200 h and E3.2: 0500 h) in experiment E3, under conditions where  
14 PPFD was zero (Table 2). Daytime measurements of leaf and root IAA and ABA (experiment  
15 E3.3) were made on tissues sampled in the morning at 0800 h, under conditions reported in Table  
16 2. Prior to each one of these samplings, whole-plant TR was determined gravimetrically during  
17 the previous hour using the same approach as mentioned earlier. In total, this resulted in 12 and 4  
18 nocturnal TR ( $\text{TR}_\text{N}$ ) and daytime TR measurements per genotype, respectively. Temperature and  
19 VPD conditions observed during this period are reported on Table 2.

20 For leaf hormonal dosage, a predetermined segment located in the middle of the  
21 uppermost fully expanded leaf was quickly cut using a sharp scalpel blade and flash-frozen in  
22 liquid nitrogen. The leaf area represented by the cut leaf segment was accounted for when  
23 normalizing calculating whole plant transpirational water loss by leaf area. Immediately after  
24 leaf harvesting, whole root systems were harvested for hormonal dosage by de-rooting the plant  
25 using a sharp blade, and mopping the roots quickly on water-absorbing tissue before placing  
26 them inside falcon tubes which were flash-frozen in liquid nitrogen.

27

28 *Hormone extraction and dosage:* After harvesting, leaf and root samples were ground in  
29 liquid nitrogen, homogenized, packaged in Eppendorf tubes and stored in a  $-80^\circ\text{C}$  freezer. Free  
30 IAA and ABA were extracted based on the extraction procedure described in Prinsen *et al.*,  
31 (2000). Briefly, homogenized plant material (60-80 mg) was extracted overnight in 80%

1 methanol (10  $\mu$ l/mg fresh weight). C613-phenyl-IAA (50 pmol, Cambridge Isotope Laboratories  
2 Inc., Andover, Massachusetts, USA) and D6-ABA (100 pmol, ( $\pm$ )-3',5',5',7',7',7'-d6 ABA,  
3 National research council Canada, Saskatoon, Canada) were added as internal standards. After  
4 centrifugation (20000 g, 15 min, 4  $^{\circ}$ C, 5810R, rotor FA-45-30-11 Eppendorf, Hamburg,  
5 Germany) the supernatant was passed over a C18 cartridge (500 mg, Varian, Middelburg, the  
6 Netherlands) to retain pigments. The effluent was then diluted to 50% methanol and concentrated  
7 on a DEAE-Sephadex (2ml, GE Healthcare Bio-Sciences AB, Uppsala, Sweden) anion exchange  
8 column for the analysis of free IAA and ABA, which are retained on the DEAE. The DEAE  
9 cartridge was eluted with 10ml 6% formic acid and IAA and ABA were concentrated on a C18  
10 cartridge, which was coupled underneath. This C18 cartridge was eluted with 2x0.5 ml  
11 diethylether. The ether was evaporated under vacuum and the sample was dissolved in acidified  
12 methanol for methylation with diazomethane. After methylation, the samples were dried under a  
13 nitrogen stream and samples were further dissolved in 50  $\mu$ l 10% MeOH for analysis.

14  
15 IAA and ABA concentrations were determined following the protocol by Prinsen *et al.*,  
16 (1995). Leaf and root IAA and ABA were analyzed by UPLC-MS/MS (Acquity TQD, Waters,  
17 Manchester, UK). The settings for the analysis were as follows: 6  $\mu$ l injection by partial loop,  
18 column T. 30 $^{\circ}$ C, solvent gradient 0-2 min: 95/5; 10% MeOH in NH<sub>4</sub>Oac 1 mM/MeOH; 2-4 min  
19 linear gradient until 10/90 10% MeOH in NH<sub>4</sub>Oac 1 mM/MeOH; 4-6 min, isocratic 10/90 10%  
20 MeOH in NH<sub>4</sub>Oac 1mM/MeOH; MS conditions: Polarity MS ES(+), capillary 2 kV, cone 20 V,  
21 collision energy: 20 eV, source temperature: 120  $^{\circ}$ C, desolvation Temperature: 450  $^{\circ}$ C, Cone gas  
22 flow 50 l/h, desolvation gas flow: 750 l/h, collision gas flow: 0.19 ml/h). The diagnostic ions  
23 used for quantification are 190>130 m/z for Me-IAA, 196>136 m/z for Me-C13-IAA, 279>173  
24 m/z for Me-ABA and 285>179 m/z for d6-Me-ABA (dwell time 0.020 sec). Methanol and water  
25 used for MS are UPLC grade from Biosolve (Valkenswaard, the Netherlands). Data are  
26 expressed in pmol per gram fresh weight (pmol g<sup>-1</sup> FW). Using this method, root ABA  
27 concentrations were too low to be detected since there were below the detection threshold of 10  
28 pmol g<sup>-1</sup> FW (Prinsen *et al.*, 1995).

29  
30 *Leaf anatomical measurements*

1            During experiment E4, 5-cm leaf segments from the 8 selected genotypes were examined  
2 for leaf anatomical traits. These segments were carefully sectioned from the middle part (approx.  
3 10 cm from the leaf tip) of the top, most fully developed leaf using a scalpel blade and  
4 instantaneously fixed with FAA solution [Ethanol 99% (45% vol), demineralized water (45% vol),  
5 Formaldehyde 36% (5% vol), acetic acid (5% vol)] during one week. Afterwards, they were  
6 transferred into a bleaching solution [Ethanol 99% (70% vol), acetic acid (30% vol)] for 3 days.  
7 Samples were then stored for approx. 3 weeks in an ethanol/water solution (70% vol / 30% vol)  
8 prior to further examination.

9            Freehand sections were produced using sharp razor blade and stained with a safranin  
10 solution [0.5 g/L – Ethanol/Water (1/19)] for 10 seconds before being quickly rinsed with water  
11 followed by 100% ethanol to avoid an over-coloration. Afterwards, thin leaf slices were mounted  
12 on microscope blade at an amplification  $\times 400$ . Approximately fifty pictures were taken for each  
13 leaf in order to cover the entire transversal section of each leaf. Using the Image-J plugin  
14 Mosaic-J, images were then sequentially placed, adjusted and merged in order to obtain one  
15 complete, large angle and high resolution image of the entire leaf transversal section  
16 **[Supplementary Data Fig. S2]**.

17            Those images were then used to quantify the leaf traits reported on **Supplementary Data**  
18 **Fig. S2**. The following anatomical traits were then determined on each leaf section image using  
19 distance and area measurement tools from image-J software: Leaf width (LW, mm), major and  
20 minor vein densities (respectively  $VD_M$ ,  $VD_m$ ,  $mm^{-1}$ ), average distance between veins (DV,  $\mu m$ ),  
21 average vein section area (VSA,  $\mu m^2$ ), average meta-xylem section area (MXA,  $\mu m^2$ ), average  
22 leaf thickness (LT,  $\mu m$ ). LW was measured as the length of the straight line passing through all  
23 the vein centers from one border of the leaf to the other **[Supplementary Data Fig. S2]**.  $VD_M$ ,  
24  $VD_m$  were calculated as the leaf width divided by the number of major and minor veins,  
25 respectively. DV was measured from the centre of the vein to the centre of the following one  
26 (irrespective of the type of the vein) and averaged on the whole leaf cross section. VSA is the  
27 area delimited by the mestome sheath. MXA was calculated as the averaged section area of the  
28 two main meta-xylem vessels in each major vein. LT was determined from the leaf thickness  
29 measured at all the veins and between all the veins **[Supplementary Data Fig. S2]**. Abaxial and  
30 adaxial stomata densities ( $mm^{-2}$ , AB\_SD and AD\_SD, respectively) were previously determined  
31 for those genotypes at a similar leaf position in a previous study (Schoppach *et al.*, 2016).

1

## 2 *Data and statistical analysis*

3 All statistical analyses (regression analyses, correlation analyses, one-way ANOVAs)  
4 were carried out using GraphPad PRISM version 7.0b (GraphPad Software Inc., San Diego, CA,  
5 2017).

6

7

## 8 **RESULTS**

9

### 10 *Daytime root auxin levels correlate with daytime transpiration and plant hydraulic conductance* 11 *measured independently*

12 Daytime root IAA concentrations significantly correlated with all three hydraulic traits  
13 examined in the study, namely whole-plant daytime TR (Fig. 1A),  $K_{\text{Plant}}$  (Fig. 1B) and the  
14 previously characterized slopes of whole-plant TR responses to increasing VPD (Fig. 1C),  
15 determined in Schoppach *et al.* (2016). In all cases, the correlations were negative, with  
16 Pearson's  $r$  values ranging from -0.75 (root IAA vs. slopes) to -0.9 (root IAA vs. daytime TR).  
17 The correlation analysis also revealed that  $K_{\text{Plant}}$  strongly and positively correlated with the  
18 independently measured slopes of TR responses to VPD (Pearson's  $r = 0.84$ ,  $P = 0.008$ ,  $R^2 =$   
19  $0.72$ , Fig. 2), indicating that the selected 8 genotypes consistently exhibit the same hydraulic  
20 properties independent of the experiment.

21 In sharp contrast to daytime root IAA, daytime leaf IAA and leaf ABA concentrations  
22 were found to not significantly correlate with daytime whole-plant TR,  $K_{\text{Plant}}$ , or the slopes of  
23 whole-plant TR responses to increasing VPD (Figs. 1D-1I). Further, daytime leaf IAA and leaf  
24 ABA concentrations did not correlate with any of the examined leaf vascular traits.

25

### 26 *Night-time root IAA levels are stable across experiments*

27 Regardless of the time of the day, root ABA concentrations were below the detection  
28 levels of the method used for quantification (see Materials and Methods). Irrespective of the  
29 genotype, night-time leaf IAA, root IAA and leaf ABA concentrations did not vary significantly  
30 between experiments E3.1 and E3.2 (Fig. 3A). Experiment E2 exhibited significantly lower leaf  
31 IAA and higher leaf ABA concentrations (Fig. 3B), but in contrast, night-time IAA root

1 concentrations were more stable and did not exhibit significant variation across all 3 experiments  
2 (Fig. 3C). Correlation analyses showed that genotypic rankings in night-time leaf IAA and leaf  
3 ABA levels were not consistent across experiments, even between E3.1 and E3.2, and none of  
4 these concentrations significantly correlated with leaf vasculature measurements.

5 Root IAA concentrations were highly correlated between E2 and E3.1 ( $r = 0.97$ ,  $P <$   
6  $0.0001$ ) and between E3.1 and E3.2 (Pearson's  $r = 0.74$ ,  $P = 0.037$ ), while the correlation  
7 between E2 and E3.2 was significant at  $P = 0.08$  (Pearson's  $r = 0.65$ ) as a result of an outlier  
8 datum ( $P < 0.05$  if removed). Therefore, night-time root IAA data was pooled across the 3  
9 experiments for further analysis (see below).

10

11 *Night-time root IAA is genotype-dependent and correlates strongly with daytime root IAA and*  
12 *with nocturnal transpiration rates*

13 As reported on Fig. 4, variation in root IAA was found to be strongly dependent on  
14 genotypes both during the night ( $P < 0.0001$ , Fig. 4A) and the day ( $P < 0.005$ , Fig. 4B). During the  
15 night, root IAA concentrations ranged from  $24.3 \text{ pmol g}^{-1}$  for genotype DH\_127 to more than  
16 twice that value, around  $49.8 \text{ pmol g}^{-1}$  for genotype DH\_035. This variation was spanning a  
17 similar range during the day, from  $22.4 \text{ pmol g}^{-1}$  (genotype DH\_127) to  $43.4 \text{ pmol g}^{-1}$  (genotype  
18 DH\_003), with a similar ranking among genotypes (compare panels A and B in Fig. 4).

19 Consistently, root IAA concentrations were found to be strongly and positively correlated among  
20 these 8 lines (Pearson's  $r = 0.83$ ,  $R^2 = 0.68$ ,  $P = 0.011$ , Fig. 5).

21 Regardless of the experiment, night-time root IAA concentrations correlated significantly  
22 with  $TR_N$  (Pearson's  $r = -0.69$ ,  $R^2 = 0.48$ ,  $P < 0.0005$ , Fig. 6). This correlation was confirmed  
23 (i.e., statistically significant) when analysing separately data from experiments E3.1 and E3.2  
24 (not shown), while experiment E2 displayed a very similar but non-significant tendency as a  
25 result of one single outlier datum ( $R^2 = 0.81$  and  $P < 0.01$  if outlier not included). Night-time root  
26 IAA concentrations did not correlate with any of the leaf anatomical traits examined.

27

28

29

30

31

## 1 DISCUSSION

2

3 *Root auxins are potentially involved in regulating daytime whole-plant hydraulics*

4 A first major finding of this research was that root IAA –but not leaf IAA– was  
5 potentially involved in controlling daytime water use in wheat, in a way that is consistent with  
6 the contrasted root hydraulic properties of the parents of the studied population and with what we  
7 already know about auxin putative roles in plant hydraulics (see below for details). To our  
8 knowledge, this is the first time that auxin is shown to be involved in whole-plant hydraulics,  
9 with a role in the expression of a water saving-trait that has been mechanistically linked to  
10 improved yields under terminal drought conditions.

11

12 In this investigation, this finding stems from the convergence of three independent  
13 sources of evidence, highlighting a negative correlation between root IAA and i) whole-plant TR  
14 (Fig. 1A), ii)  $K_{\text{Plant}}$  (Fig. 1B) and iii) the slope of TR response curves to increasing VPD (Fig.  
15 1C). In all cases, those correlations were of the same sign, collectively indicating a putative  
16 involvement of auxin accumulation in the root in the expression of a hydraulic restriction at the  
17 canopy level. Such results are in line with Péret *et al.* (2012) who found that accumulation of  
18 root auxin decreases hydraulic conductivity at both the cell and whole root levels by negatively  
19 regulating AQP expression, in support of previous findings of Paciorek *et al.* (2005) who  
20 demonstrated that auxin suppress the endocytosis of PIP2 aquaporin in *Arabidopsis thaliana*.

21 These findings also strongly support previous results established on the parents of this  
22 population which indicated that lower TR under high VPD expressed by the drought-tolerant  
23 parent RAC875 relative to the drought-sensitive parent (Kukri) is likely stemming from a lower  
24 hydraulic conductivity of the roots of the former. Interestingly, this hydraulic limitation was  
25 found to be associated with decreased CMX vessel diameters combined with a restriction on the  
26 radial, AQP-mediated water transport in the root (Schoppach *et al.*, 2014a)-- both of which are  
27 influenced by auxin. Indeed, local accumulation of root auxin is consistent with their role in  
28 repressing of root aquaporins (Péret *et al.*, 2012) and in decreasing the vascular cell size  
29 (Fàbregas *et al.*, 2015). Furthermore, the involvement of root auxin is consistent with the  
30 outcome of the QTL mapping carried out on the DH population from which the 8 genotypes of  
31 the study were selected, and the independent RNASeq analysis which mapped the peak region of

1 the major QTL for TR responses to VPD to root-specific transcripts with functions suggesting  
2 involvement of root auxin (Schoppach *et al.*, 2016).

3  
4 The lack of correlation between leaf IAA, leaf ABA and the hydraulic variables  
5 examined in this study seems to further support the idea of a predominant involvement of auxin-  
6 mediated root hydraulic processes in controlling whole-plant water use in wheat, at least in this  
7 population. However, our inability to measure root ABA in this study does not allow to discard  
8 the possibility that genotypic variation in root ABA would have contributed to variation in TR  
9 response to VPD, as suggested by a previous study on durum wheat (Kudoyarova *et al.*, 2011).  
10 Furthermore, our study does not discard the possibility that auxin effects were mediated through  
11 interaction with other plant hormones such as cytokinin and ethylene as suggested by studies  
12 highlighting such cross-talks (Tanaka *et al.*, 2006; Rowe *et al.*, 2016). Regardless, the above  
13 findings make it clear that root auxin plays an important role in regulating whole-plant water use  
14 and hydraulic properties at least in this population.

#### 15 16 *A potential role for root auxins in controlling nocturnal transpiration*

17 The second major finding of this investigation was that nocturnal water use is strongly  
18 and negatively correlated with auxin accumulation levels in wheat roots (Fig. 6). This finding  
19 was consistently observed over three independent experiments. To our knowledge, this is the  
20 first time that variation in hormonal levels were associated with changes in nocturnal water use.  
21 Importantly, the negative correlation between root auxin concentrations and TR<sub>N</sub> was consistent  
22 with the relationship linking daytime root auxin concentration and daytime water use, indicating  
23 that root auxin accumulation tends to reduce transpiration regardless of the time of the day, a  
24 hypothesis reinforced by the strong correlation between daytime and night-time auxin levels in  
25 the roots (Fig. 5). This in turn may help explain why the drought-tolerant parent RAC875  
26 expressed the water-saving behaviour both during the day and the night, and more generally, the  
27 previously reported strong correlation between daytime and night-time slopes of TR response to  
28 VPD on wheat (Schoppach *et al.*, 2014b). Similar to daytime conditions, leaf IAA, leaf ABA and  
29 leaf vascular traits were not found to correlate with TR<sub>N</sub> values, indicating that this TR<sub>N</sub>  
30 variation in this population is largely controlled by roots. However, as previously stated, the

1 additional involvement of root ABA could not be discarded, given that the root ABA  
2 concentrations were below the detection levels of the method used for quantification.

3  
4 The dominating theories explaining the functional relevance of nocturnal water use  
5 typically revolve around transport mechanisms, defining a trade-off space where roots are central  
6 players. For instance, it is thought that increased  $TR_N$  would facilitate nitrogen acquisition by  
7 roots grown in N-limited environments (Rohula *et al.*, 2014), and oxygen delivery in the xylem  
8 sap to sustain dark respiration-mediated nocturnal carbohydrate export (Marks and Lechowicz,  
9 2007). On the other hand, increases in  $TR_N$  could also decrease the rate of hydraulic  
10 redistribution in the soil, a phenomenon driving the movement of water from moist to dry soil  
11 through the root system, which was associated with enhanced daytime transpiration efficiency  
12 and whole-season growth (Howard *et al.*, 2009; Neumann *et al.*, 2014). In concert with studies  
13 documenting regulatory effects of root auxin on aquaporin-mediated root hydraulic conductivity  
14 (Péret *et al.*, 2012), xylem vessel development (Fàbregas *et al.*, 2015), and nitrogen foraging by  
15 the roots (Song *et al.*, 2013), our results indicate that the root auxins are potentially involved in  
16 the trade-offs associated with  $TR_N$ .

17  
18 *Root auxins: implications for drought tolerance*

19 The key findings of this research are consistent with a stream of recent publications  
20 suggesting the involvement of root auxins in crop drought tolerance. Our own findings on wheat  
21 indicate that root auxin accumulation potentially drives the restriction in root hydraulic  
22 conductivity that is associated with the expression of the water-saving limitation of whole-plant  
23  $TR$ , particularly under times of the day with high evaporative demand (Schoppach *et al.*, 2014a)  
24 or the night (Schoppach *et al.*, 2014b, Claverie *et al.*, 2018). Other research suggests yield  
25 benefits resulting from auxin accumulation in the roots, although the link with whole-plant  
26 hydraulics was not documented. On maize, Li *et al.* (2018) found that maize mutants over-  
27 expressing ZmPIN1a exhibited an increase in auxin export from the shoot to the root where its  
28 accumulation in the root tips drove enhanced root development that was associated with  
29 increased yields under drought, likely through improved water acquisition. On wheat, the over-  
30 expression of the gene Auxin Biosynthetic TRYPTOPHAN AMINOTRANSFERASE  
31 RELATED TaTAR2.1-3A was associated with enhanced grain yield under various N supply



1 levels that was likely to be the result of enhanced lateral root branching that promoted N foraging  
2 capabilities. Importantly, this gene was found to be predominantly expressed in the roots and its  
3 overexpression generated elevated auxin accumulation in the primary and lateral root tips (Shao  
4 *et al.*, 2017). Finally, on sorghum, multiple QTL controlling stay-green, a trait that is linked to  
5 tolerance to terminal drought, have been found to co-localize with markers associated with an  
6 auxin-responsive gene (indole-3-acetic acid-amido synthetase GH3.5, Rama Reddy *et al.*, 2014)  
7 or to genes from the PIN family of auxin efflux carriers (Borrell *et al.* 2015).

8 Taken together, these results indicate root auxin accumulation drive yield increases under  
9 drought either via a dynamic regulation of root hydraulic conductivity in order to express a  
10 water-saving behavior or via a developmental control of branching to optimize water capture,  
11 two strategies that have been proven to be widely effective in drought breeding (e.g., Vadez  
12 2014; Wasson *et al.*, 2012).

13

#### 14 *Caveats and limits*

15 This study suggests an important role for root IAA in controlling daytime and nocturnal  
16 water use, but does not necessarily discard the hypothesis that root and shoot ABA are also  
17 involved in regulating whole-plant TR under increasing VPD as previously found on durum  
18 wheat (Kudoyarova *et al.*, 2011). Indeed, in this investigation, root ABA levels were below the  
19 detection threshold of the method used for quantification, which is around 10 pmol g<sup>-1</sup> FW, while  
20 in the above study, nominal root ABA concentrations were equivalent to 6.8 pmol g<sup>-1</sup> FW.  
21 However, it is noteworthy that in Kudoyarova *et al.* (2011), experiments were carried on another  
22 species, (durum wheat), on young seedlings (7-day old) and using a different technique  
23 (immunoassay). While always possible, an error in the protocol used in this study is unlikely,  
24 considering the consistency of lack of detection of root ABA and the consistent levels of root  
25 IAA across independent experiments and genotypes.

26 Another potentially confounding effect in this research was that leaf-level determinations  
27 of IAA and ABA concentrations were made on the basis of single leaves, while root  
28 concentrations were made on the basis of the bulk root system. While we harvested tissue  
29 segments from leaves having similar age and positions in upper layer of the canopy, it is possible  
30 that leaf-to-leaf variation masked correlations between leaf auxin or ABA and the examined  
31 traits. That said, whole-root system hormonal dosage does not necessarily guarantee stable,

1 consistent measurements, since roots of different ranks, age and microenvironment are not  
2 necessarily expected to exhibit the same hormonal concentrations. In any case, further studies are  
3 required to illuminate i) the exact mechanisms controlling auxin redistribution from the shoot to  
4 the root, ii) the interplay between root auxin accumulation and root/shoot hydraulic properties  
5 and iii) the role played by interactions with other hormones such as ABA, ethylene and  
6 cytokinin.

7  
8

## 9 **CONCLUSIONS**

10 This study indicates that variation in whole-plant transpiration responses to evaporative  
11 demand, a major trait that drives the expression of water-saving, drought-tolerance strategies in  
12 wheat, is potentially controlled by auxin levels in the root system. Specifically, root auxin  
13 accumulation was found to be negatively correlated with instantaneous TR, the slope of whole  
14 plant TR response to VPD and plant hydraulic conductance. Furthermore, we unravelled a  
15 previously undocumented association between root auxin and nocturnal water use in a way that  
16 is consistent with its role as a negative regulator of hydraulic conductance.

17 Those findings illuminate potentially important roles of root auxin in regulating daytime  
18 and nocturnal water use that are consistent with previous physiological, genetic and molecular  
19 evidence established on the studied population. They are also in line with evidence from other  
20 sources documenting a role of root auxins in regulating hydraulic conductivity and enhancing  
21 crop yields under water-limited environments. While this study suggests that root auxin levels  
22 might be a stable trait that could predict drought tolerance capabilities of wheat genotypes,  
23 further investigation is needed to mechanistically link auxin accumulation and its hydraulic and  
24 developmental consequences at the local and the whole-plant levels and in relation to other  
25 hormones.

26  
27

## 28 **FUNDING INFORMATION**

29 This research was funded in part by the Belgian National Fund for Scientific Research (FNRS,  
30 contract# 1.E038.13), the Minnesota Agricultural Experiment Station (MAES, project# MIN-13-

1 095) and by the National Science Foundation/ Civilian Research & Development Foundation  
2 (award# OISE-16-62788-0).

3

4

5 **ACKNOWLEDGEMENTS**

6 We thank Elisabeth Majerus for her help in preparing leaf sections and Coline Kinkin for her  
7 help in grinding tissue samples for hormone dosage.

1 **LITTERATURE CITED**

2

3 **Alabdallah O, Ahou A, Mancuso N, Pompili V, Macone A, Pashkoulov D, Stano P, Cona A,**  
4 **Angelini R, Tavladoraki P. 2017.** The Arabidopsis polyamine oxidase/dehydrogenase 5  
5 interferes with cytokinin and auxin signaling pathways to control xylem differentiation.  
6 *Journal of Experimental Botany* **68**: 997–1012.

7 **Berger J, Palta J, Vadez V. 2016.** Review: An integrated framework for crop adaptation to dry  
8 environments: Responses to transient and terminal drought. *Plant Science* **253**: 58–67.

9 **Borrell A, Mullet J, George-Jaeggli B, van Oosterom E, Mace E, Hammer G, Klein P,**  
10 **Weers B, Shanshan Y, Jordan D. 2015.** Identifying the function of sorghum's drought  
11 tolerance stay-green QTL. Plant and Animal Genome XXIII Conference, January 10-15,  
12 San Diego, California USA.

13 **Caringella MA, Bongers FJ, Sack L. 2015.** Leaf hydraulic conductance varies with vein  
14 anatomy across Arabidopsis thaliana wild-type and leaf vein mutants. *Plant Cell and*  
15 *Environment* **38** (12): 2735–2746.

16 **Coupel-Ledru A, Lebon E, Christophe A, Gallo A, Gago P, 2016. Pantin F, Doligez A,**  
17 **Simonneau T. 2016.** Reduced nighttime transpiration is a relevant breeding target for high  
18 water-use efficiency in grapevine. *Proceedings of the National Academy of Sciences of the*  
19 *United States of America* **113**: 8963–8968.

20 **Fàbregas N, Formosa-Jordan P, Confraria A, Siligato R, Alonso JM, Swarup R, Bennett**  
21 **MJ, Mähönen AP, Caño-Delgado AI, Ibañes M. 2015.** Auxin influx carriers control  
22 vascular patterning and xylem differentiation in Arabidopsis thaliana. *PLoS Genetics* **11** (4),  
23 art. no. e1005183.

24 **Guiguitant J, Marrou H, Vadez V, Gupta P, Kumar S, Soltani A, Sinclair TR, Ghanem**  
25 **ME. 2017.** Relevance of limited-transpiration trait for lentil (*Lens culinaris* Medik.) in  
26 South Asia. *Field Crops Research* **209**: 96–107.

27 **Howard AR, Van Iersel MW, Richards JH, Donovan LA. 2009.** Night-time transpiration can  
28 decrease hydraulic redistribution. *Plant, Cell and Environment* **32** (8): 1060–1070.

29 **Kholová J, Hash CT, Kumar PL, Yadav RS, Kocova M, Vadez V. 2010.** Terminal drought-  
30 tolerant pearl millet [*Pennisetum glaucum* (L) R. Br.] have high leaf ABA and limit

- 1 transpiration at high vapour pressure deficit. *Journal of Experimental Botany* **61**: 1431–  
2 1440.
- 3 **Kudoyarova G, Veselova S, Hartung W, Farhutdinov R, Veselov D, Sharipova G. 2011.**  
4 Involvement of root ABA and hydraulic conductance in the control of water relations in  
5 wheat plants exposed to increased evaporative demand. *Planta* **233**: 87–94.
- 6 **Li Z, Zhang X, Zhao Y, Li Y, Zhang G, Peng Z, Zhang J. 2018.** Enhancing auxin  
7 accumulation in maize root tips improves root growth and dwarfs plant height. *Plant*  
8 *Biotechnology Journal* **16** (1): 86–99.
- 9 **Marks CO, Lechowicz MJ. 2007.** The ecological and functional correlates of nocturnal  
10 transpiration. *Tree Physiology* **27**: 577–584.
- 11 **Maurel C, Verdoucq L, Rodrigues O. 2016.** Aquaporins and plant transpiration. *Plant Cell and*  
12 *Environment* **39** (11): 2580–2587.
- 13 **Messina CD, Sinclair TR, Hammer GL, Curan D, Thompson J, Oler Z, Gho C, Cooper M.**  
14 **2015.** Limited-transpiration trait may increase maize drought tolerance in the US corn belt.  
15 *Agronomy Journal* **107**: 1978–1986.
- 16 **Moreno-Piovano GS, Moreno JE, Cabello JV, Arce AL, Otegui ME, Chan RL. 2017.** A role  
17 for LAX2 in regulating xylem development and lateral-vein symmetry in the leaf. *Annals of*  
18 *Botany* **120** (4): 577–590.
- 19 **Neumann RB, Cardon ZG, Teshera-Levy J, Rockwell FE, Zwieniecki MA, Holbrook NM.**  
20 **2014.** Modelled hydraulic redistribution by sunflower (*Helianthus annuus*L.) matches  
21 observed data only after including night-time transpiration. *Plant, Cell and Environment* **37**  
22 (4): 899–910.
- 23 **Paciorek T, Zažímalová E, Ruthardt N, Petrášek J, Stierhof Y-D, Kleine-Vehn J, Morris**  
24 **DA, Emans N, Jürgens G, Geldner N, Friml J. 2005.** Auxin inhibits endocytosis and  
25 promotes its own efflux from cells. *Nature* **435**: 1251–1256.
- 26 **Péret B, Li G, Zhao J, Band LR, Voß U, Postaire O, Luu D-T, Da Ines O, Casimiro I,**  
27 **Lucas M, Wells DM, Lazzerini L, Nacry P, King JR, Jensen OE, Schäffner AR,**  
28 **Maurel C, Bennett MJ. 2012.** Auxin regulates aquaporin function to facilitate lateral root  
29 emergence. *Nature Cell Biology*, **14** (10): 991–998.

- 1 **Prinsen E, Redig P, Strnad M, Galís I, Van Dongen W, Van Onckelen H. 1995.** Quantifying  
2 phytohormones in transformed plants. In Gartland KMA and Davey MR, eds.  
3 *Agrobacterium Protocols*. Springer, Totowa, NJ, 245–262
- 4 **Prinsen E, van Laer S, Öden S, van Onckelen H. 2000.** Auxin analysis. In: Tucker GA and  
5 Robert JA, eds. *Plant hormone protocols*. Humana Press, Totowa, NJ, 49–65.
- 6 **Rama Reddy NR, Ragimasalawada M, Sabbavarapu MM, Nadoor S, Patil JV. 2014.**  
7 Detection and validation of stay-green QTL in post-rainy sorghum involving widely adapted  
8 cultivar, M35-1 and a popular stay-green genotype B35. *BMC Genomics* **15** (1), art. no. 909.
- 9 **Rawson HM, Clarke JM. 1988.** Nocturnal transpiration in wheat. *Australian Journal of Plant*  
10 *Physiology* **15**: 397–406.
- 11 **Rengel Z, Graham RD. 1996.** Uptake of zinc from chelate-buffered nutrient solutions by wheat  
12 genotypes differing in zinc efficiency. *Journal of Experimental Botany* **47**: 217–226.
- 13 **Resco de Dios V, Roy J, Ferrio JP, Alday JG, Landais D, Milcu A, Gessler A. 2015.**  
14 Processes driving nocturnal transpiration and implications for estimating land  
15 evapotranspiration. *Scientific Reports* **5**: 10975.
- 16 **Richards RA, Passioura JB. 1989.** A breeding program to reduce the diameter of the major  
17 xylem vessel in the seminal roots of wheat and its effect on grain yield in rain-fed  
18 environments. *Australian Journal of Agricultural Research* **40**: 943–950.
- 19 **Rowe JH, Topping JF, Liu J, Lindsey K. 2016.** Abscisic acid regulates root growth under  
20 osmotic stress conditions via an interacting hormonal network with cytokinin, ethylene and  
21 auxin. *New Phytologist* **211**: 225–239.
- 22 **Rohula G, Kupper P, Räm O, Sellin A, Söber A. 2014.** Patterns of night-time water use are  
23 interrelated with leaf nitrogen concentration in shoots of 16 deciduous woody species.  
24 *Environmental and Experimental Botany* **99**: 180–188.
- 25 **Schoppach R, Wauthelet D, Jeanguenin L, Sadok W. 2014a.** Conservative water use under  
26 high evaporative demand associated with smaller root metaxylem and limited trans-  
27 membrane water transport in wheat. *Functional Plant Biology* **41**: 257–269.
- 28 **Schoppach R, Claverie E, Sadok W. 2014b.** Genotype-dependent influence of night-time  
29 vapour pressure deficit on night-time transpiration and daytime gas exchange in wheat.  
30 *Functional Plant Biology* **41**: 963–971.

- 1 **Schoppach R, Fleury D, Sinclair TR, Sadok W. 2017.** Transpiration sensitivity to evaporative  
2 demand across 120 years of breeding of Australian wheat cultivars. *Journal of Agronomy*  
3 *and Crop Science* **203**: 219–226.
- 4 **Schoppach R, Sadok W. 2012.** Differential sensitivities of transpiration to evaporative demand  
5 and soil water deficit among wheat elite cultivars indicate different strategies for drought  
6 tolerance. *Environmental and Experimental Botany* **84**: 1–10.
- 7 **Schoppach R, Taylor JD, Majerus E, Claverie E, Baumann U, Suchecki R, Fleury D, Sadok**  
8 **W. 2016.** High resolution mapping of traits related to whole-plant transpiration under  
9 increasing evaporative demand in wheat. *Journal of Experimental Botany* **67**: 2847–2860.
- 10 **Shao A, Ma W, Zhao X, Hu M, He X, Teng W, Li H, Tong Y. 2017.** The auxin biosynthetic  
11 TRYPTOPHAN AMINOTRANSFERASE RELATED TaTAR2.1-3A increases grain yield  
12 of wheat. *Plant Physiology* **174** (4): 2274–2288.
- 13 **Sinclair TR, Devi J, Shekoofa A, Choudhary S, Sadok W, Vadez V, Riar M, Rufty T. 2017.**  
14 Limited-transpiration response to high vapor pressure deficit in crop species. *Plant Science*  
15 **260**: 109–118.
- 16 **Sinclair TR, Hammer GL, van Oosterom EJ. 2005.** Potential yield and water- use efficiency  
17 benefits in sorghum from limited maximum transpiration rate. *Functional Plant Biology* **32**:  
18 945–952.
- 19 **Sinclair TR, Messina CD, Beatty A, Samples M. 2010.** Assessment across the united states of  
20 the benefits of altered soybean drought traits. *Agronomy Journal* **102** (2): 475–482.
- 21 **Sivasakthi K, Tharanya M, Kholová J, Muriuki RW, Thirunalasundari T, Vadez V. 2017.**  
22 Chickpea genotypes contrasting for vigor and canopy conductance also differ in their  
23 dependence on different water transport pathways. *Frontiers in Plant Science* **8**, art. no.  
24 1663.
- 25 **Solh M, Van Ginkel M. 2014.** Drought preparedness and drought mitigation in the developing  
26 world's drylands. *Weather and Climate Extremes* **3**: 62–66.
- 27 **Song W, Sun H, Li J, Gong X, Huang S, Zhu X, Zhang Y, Xu G. 2013.** Auxin distribution is  
28 differentially affected by nitrate in roots of two rice cultivars differing in responsiveness to  
29 nitrogen. *Annals of Botany* **112** (7): 1383–1393.

- 1 **Tanaka Y, Toshio T, Tamaoki M, Nakajima N, Kondo N, Hasezawa S. 2006.** Cytokinin and  
2 auxin inhibit abscisic acid-induced stomatal closure by enhancing ethylene production in  
3 *Arabidopsis*. *Journal of Experimental Botany* **57**: 2259–2266.
- 4 **Taneda H, Terashima I. 2012.** Co-ordinated development of the leaf midrib xylem with the  
5 lamina in *Nicotiana tabacum*. *Annals of Botany* **110** (1): 35–45.
- 6 **Vadez V. 2014.** Root hydraulics: The forgotten side of roots in drought adaptation. *Field Crops*  
7 *Research* **165**: 15–24.
- 8 **Vandeleur RK, Sullivan W, Athman A, Jordans C, Gilliam M, Kaiser BN, Tyerman SD.**  
9 **2014.** Rapid shoot-to-root signalling regulates root hydraulic conductance via aquaporins.  
10 *Plant, Cell and Environment* **37** (2): 520–538.
- 11 **Veselov DS, Sharipova GV, Veselov SY, Dodd IC, Ivanov I, Kudoyarova GR. 2018.** Rapid  
12 changes in root HvPIP2;2 aquaporins abundance and ABA concentration are required to  
13 enhance root hydraulic conductivity and maintain leaf water potential in response to  
14 increased evaporative demand. *Functional Plant Biology* **45** (1-2), pp. 143–149.
- 15 **Wasson AP, Richards RA, Chatrath R, Misra SC, Prasad SVS, Rebetzke GJ, Kirkegaard**  
16 **JA, Christopher J, Watt M. 2012.** Traits and selection strategies to improve root systems  
17 and water uptake in water-limited wheat crops. *Journal of Experimental Botany* **63** (9):  
18 3485–3498.
- 19 **Yoshimoto K, Takamura H, Kadota I, Motose H, Takahashi T. 2016.** Chemical control of  
20 xylem differentiation by thermospermine, xylemin, and auxin. *Scientific Reports* **6**, art. no.  
21 21487.

22  
23  
24  
25  
26  
27  
28  
29  
30  
31



1 **FIGURE LEGENDS**

2

3 **SUPPLEMENTARY DATA FIG. S1**

4 Diversity in the slopes of whole-plant transpiration rate (TR) response curves to naturally  
5 increasing vapor pressure deficit (VPD) within the population of 143 double haploid (DH) lines  
6 from the RAC875 x Kukri cross (panel A) and among the 8 lines selected lines (panels B-I).

7 Panel A: bars representing the values of the slopes ( $\pm$  S.E.) are ordered from the lowest to the  
8 highest. Black bars in panel A are for the 8 lines that were selected. Panels B to I represent the  
9 TR response curves to increasing VPD for each of the lines where the slopes of the linear

10 regressions ( $s$ ) and the coefficients of determination ( $R^2$ ) are reported. Data is from Schoppach *et*  
11 *al.*, (2016).

12

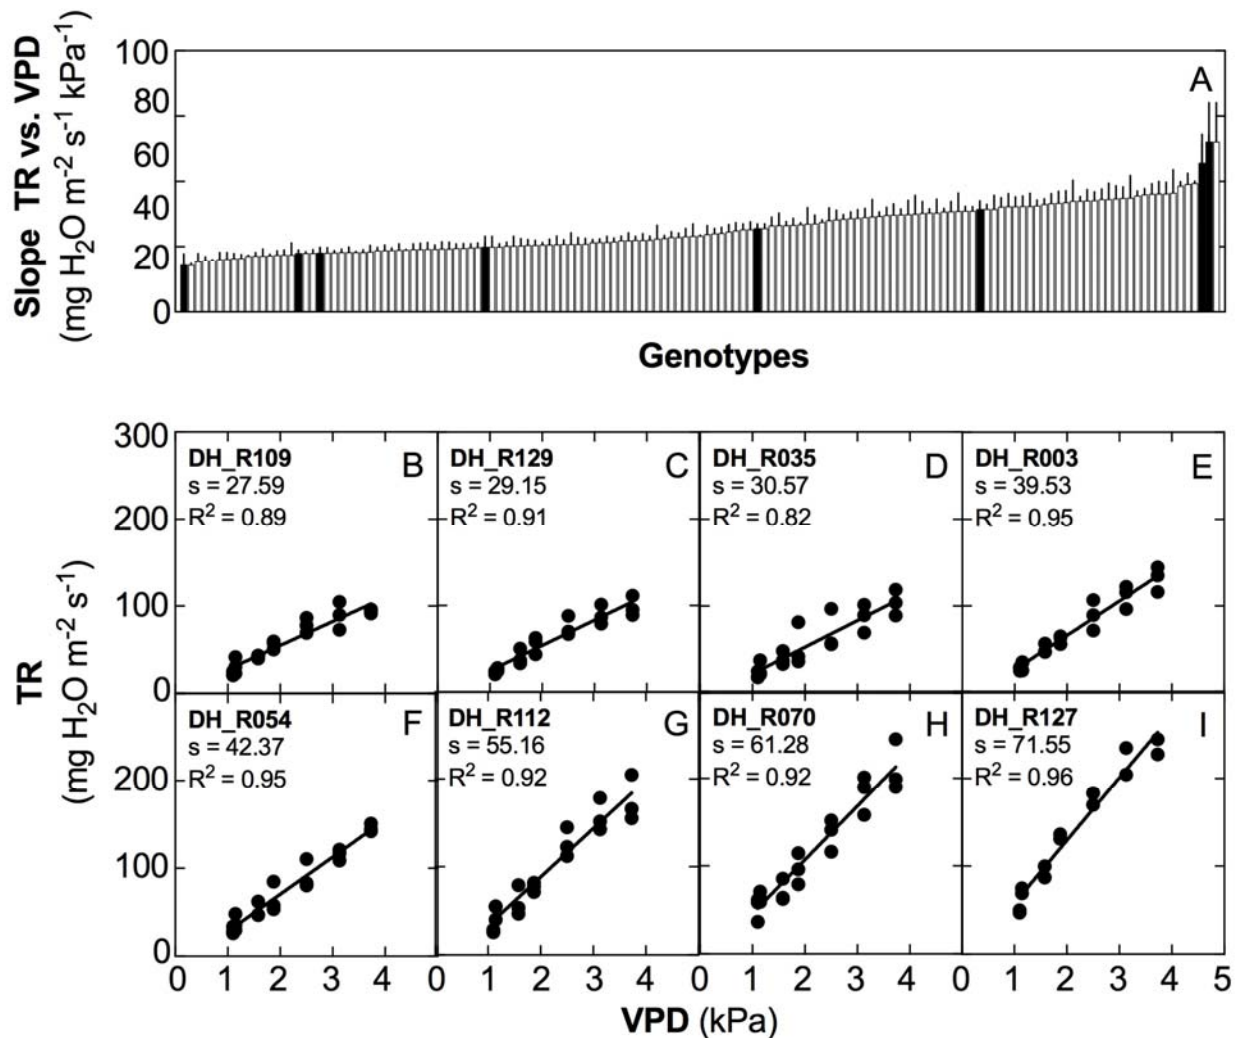

13

1 **SUPPLEMENTARY DATA FIG. S2**

2 Illustration of the examined leaf anatomical traits among the 8 lines of the study. Panel (A)  
3 represents a composite image based on the merger of 48 pictures to reconstruct a transversal  
4 view of the entire leaf. Only 50% of the image is presented here for convenience. Panel (B)  
5 represent a zoom of an area from the top picture and illustrates the traits of interest of this  
6 investigation. Blue lines delineate the vein section area (VSA) and the two main meta-xylem  
7 vessels areas (MXA) in each major vein. Horizontal arrows represent the distances (from the  
8 center) between two successive veins, which were used to calculate leaf width (LW), vein  
9 densities ( $VD_M$  and  $VD_m$ ) and average distance between veins (DV). Vertical arrows represent  
10 the leaf thickness measured at each position (at each vein and midway between consecutive  
11 veins) and averaged over the entire leaf to calculate average leaf thickness (LT, see Material and  
12 Methods for details).

13

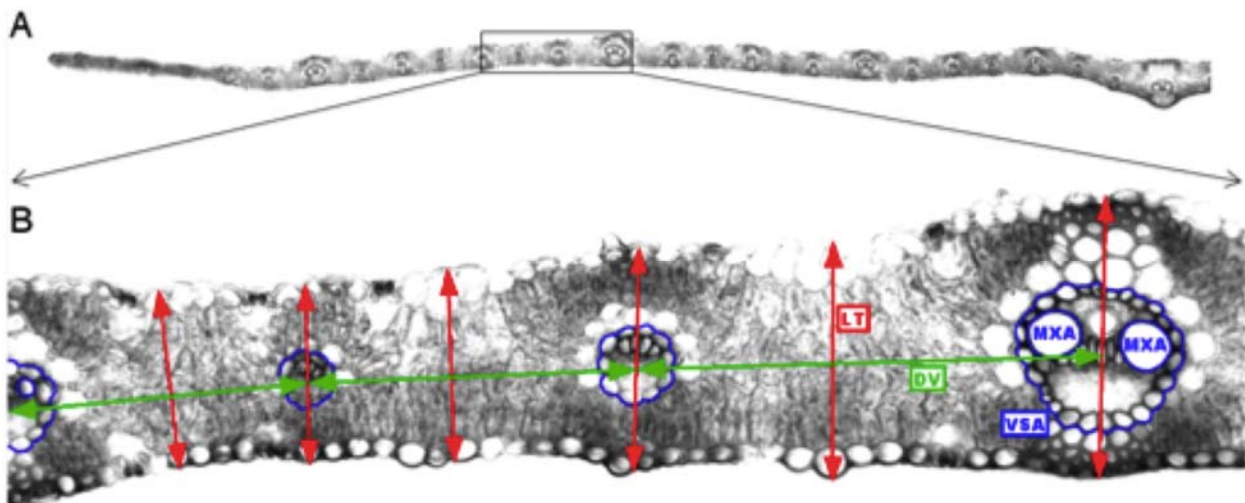

14

15

16

17

18

19

20

21

22

23

1 **FIG. 1**

2 Relationships between root or shoot concentrations in indole acetic acid (IAA) or abscisic acid  
3 (ABA) and whole-plant daytime hydraulic traits in wheat. Panels A, B and C represent  
4 correlations between root IAA and whole plant transpiration rate (TR), plant hydraulic  
5 conductance ( $K_{Plant}$ ) and the slope of TR response to VPD, respectively. Panels D-F and G-I  
6 represent correlations between leaf IAA and leaf ABA concentrations and these same variables,  
7 respectively. When significant, statistical data and regression coefficients are indicated. n.s.: non-  
8 significant correlation. Each datapoint is the average of 3 observations ( $\pm$  S.E.) made on 8 double  
9 haploid wheat lines resulting from the cross between parents RAC875 and Kukri.

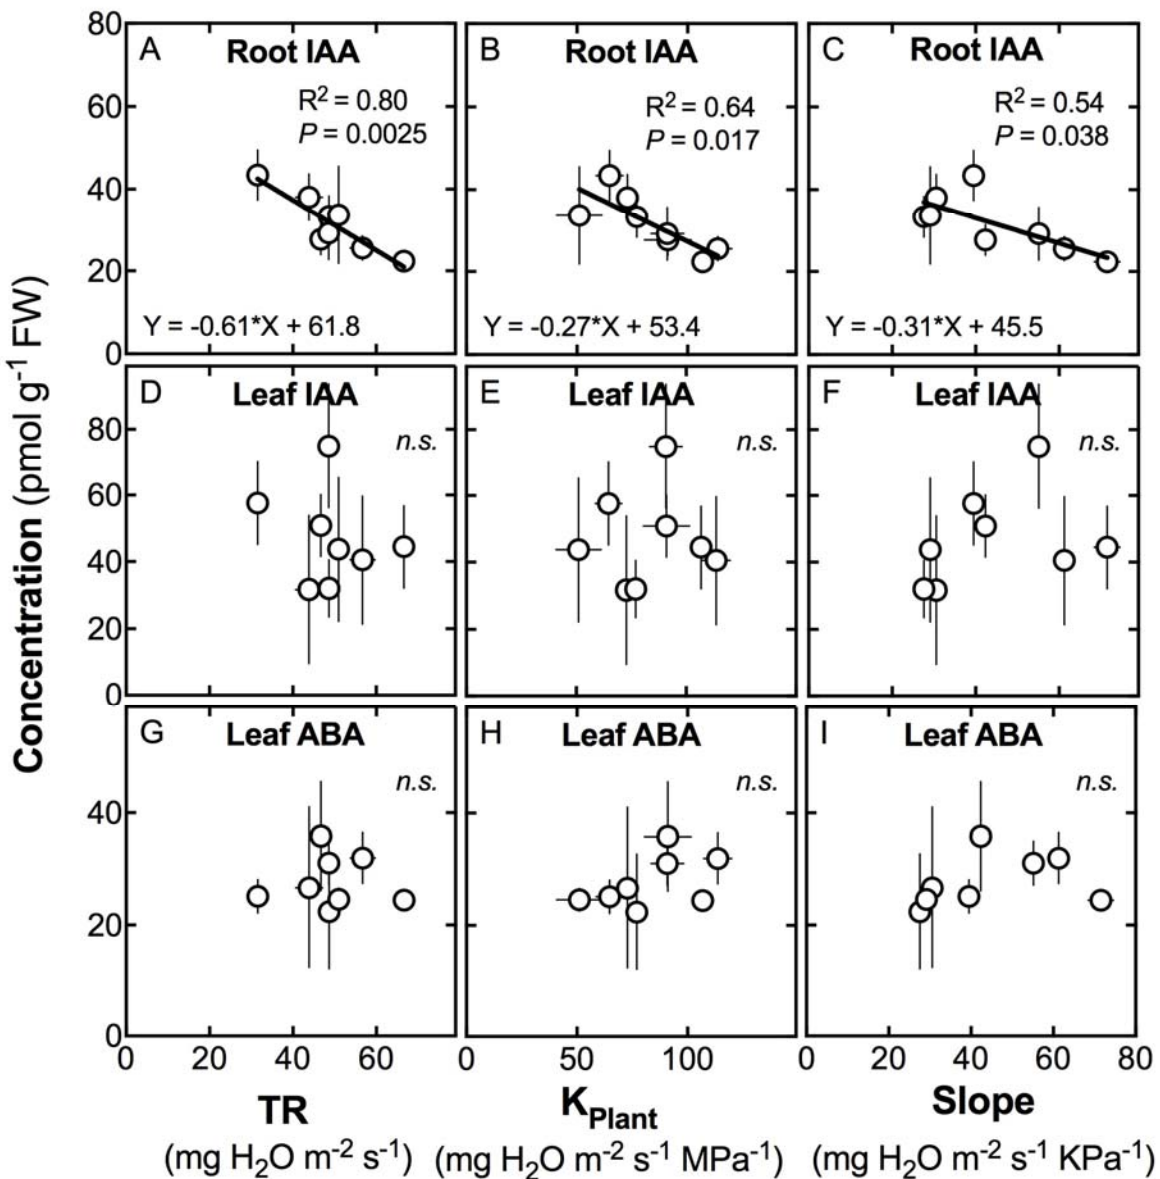

1 **FIG. 2**

2 Relationship between the slope of whole-plant transpiration rate (TR) response curve to  
3 increasing vapor pressure deficit (VPD) determined in Schoppach *et al.*, 2016) and plant  
4 hydraulic conductance ( $K_{\text{Plant}}$ ) measured independently in experiment E1 on the 8 wheat  
5 genotypes of the study.

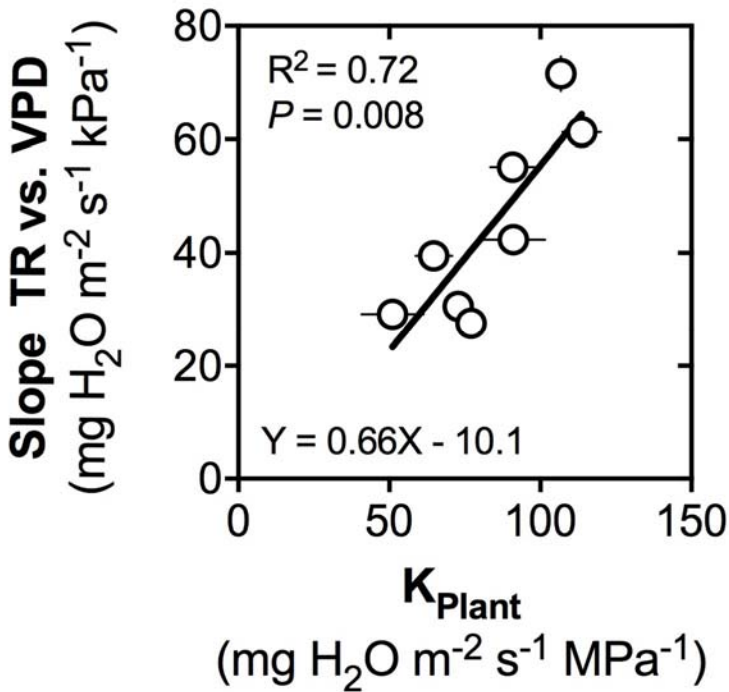

6

7

1 **FIG. 3**

2 Variation in nighttime leaf concentrations in indole acetic acid (IAA, panel A), nighttime  
3 abscisic acid (ABA, panel B) and in nighttime IAA root concentrations (panel C) across 3  
4 experiments (see Tables 1 and 2 for details about environmental conditions).

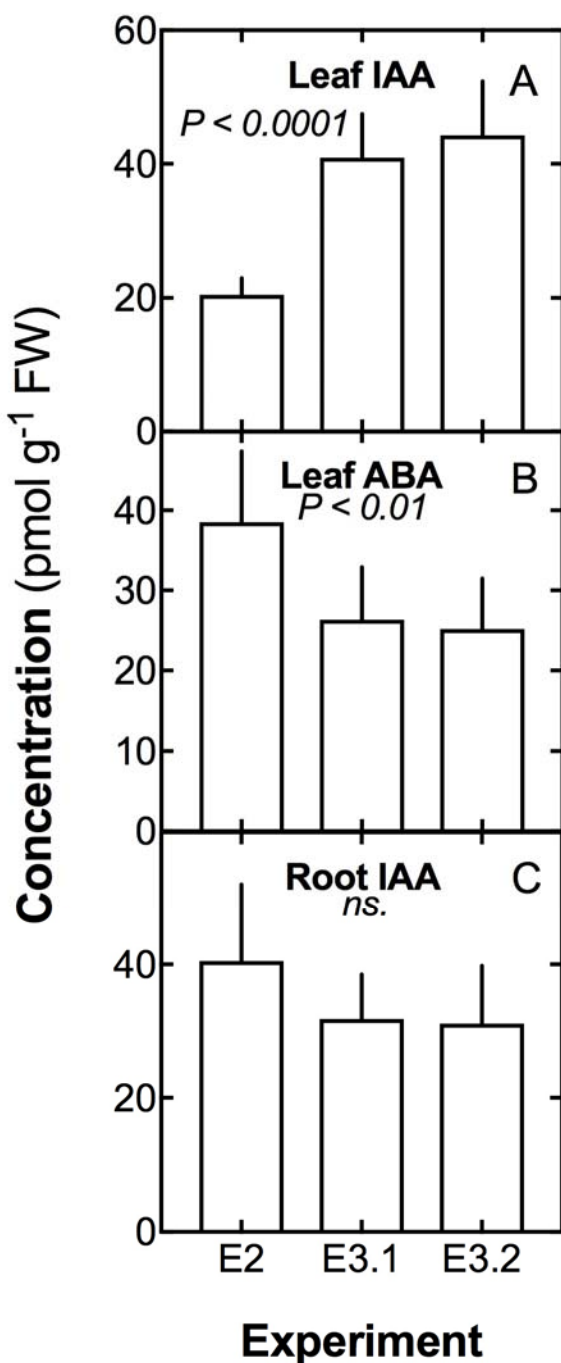

5  
6

1 **FIG. 4**

2 Genetic variability in night-time (grey bars) and daytime (open bars) indole acetic acid (IAA)  
3 concentrations in the roots of the 8 wheat genotypes of the study. P-values are significance levels  
4 of one-way ANOVAs testing for the genotypic effect of the differences in means between  
5 genotypes. Number of observations per genotype ranged from 4 (daytime) to 12 (night-time).  
6

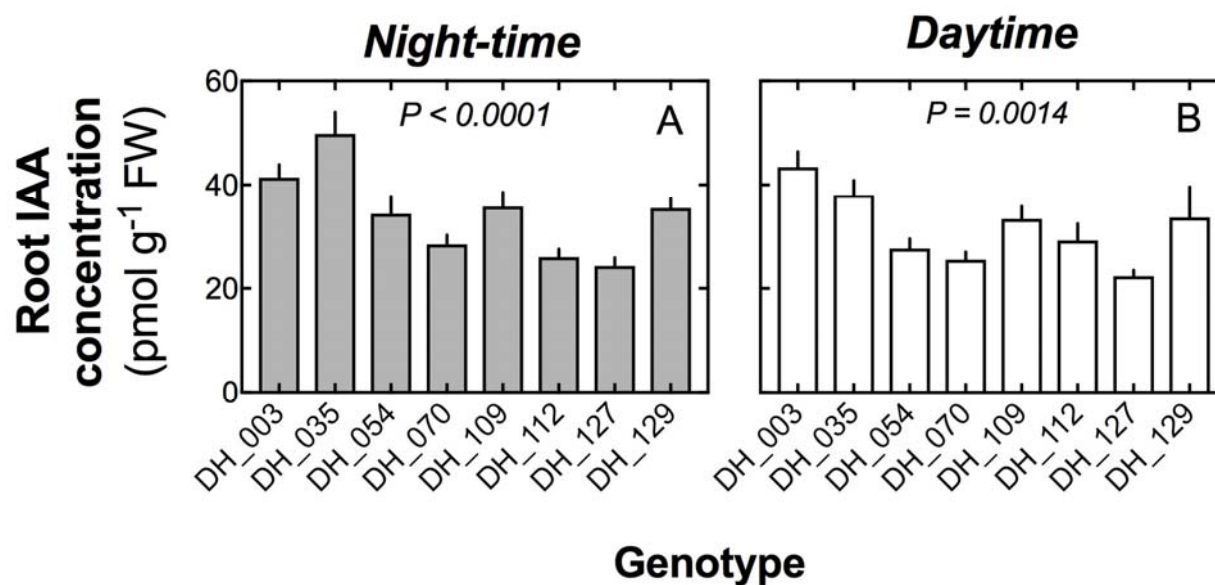

7  
8

1 **FIG. 5**

2 Relationship between nocturnal and daytime indole acetic acid (IAA) concentrations in the roots  
3 of the 8 studied wheat genotypes. Each datapoint represents a given genotype. Daytime and  
4 nighttime values are the average of 4 and 12 observations, respectively. Statistical data ( $R^2$ , P-  
5 value and regression coefficients) are indicated.

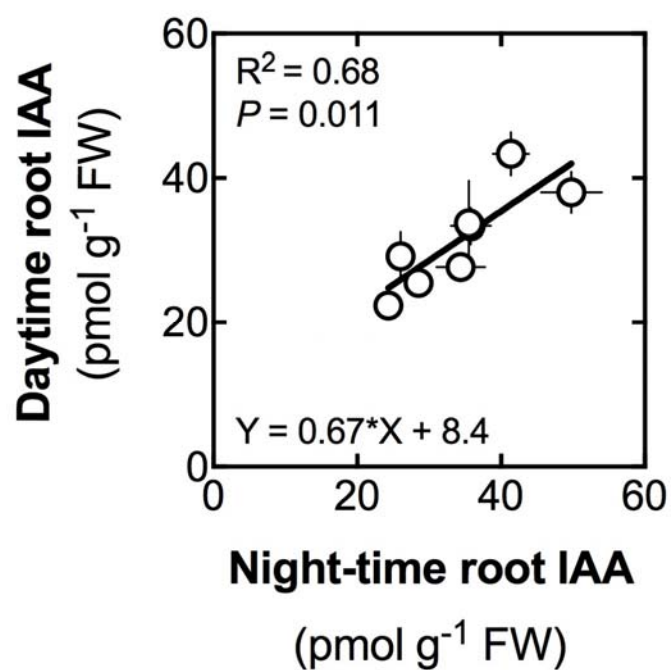

6

7

1 **FIG. 6**

2 Relationship between whole-plant nocturnal transpiration rate ( $TR_N$ ) and root concentrations in  
3 indole acetic acid (IAA) in among the 8 studied wheat genotypes. Each datapoint is the average  
4 of 3-4 ( $\pm$  S.E.) observations. Data is pooled from three independent experiments (see Materials  
5 and Methods for details). Statistical data for the regression ( $R^2$ , P-value and regression  
6 coefficient) are indicated.

7

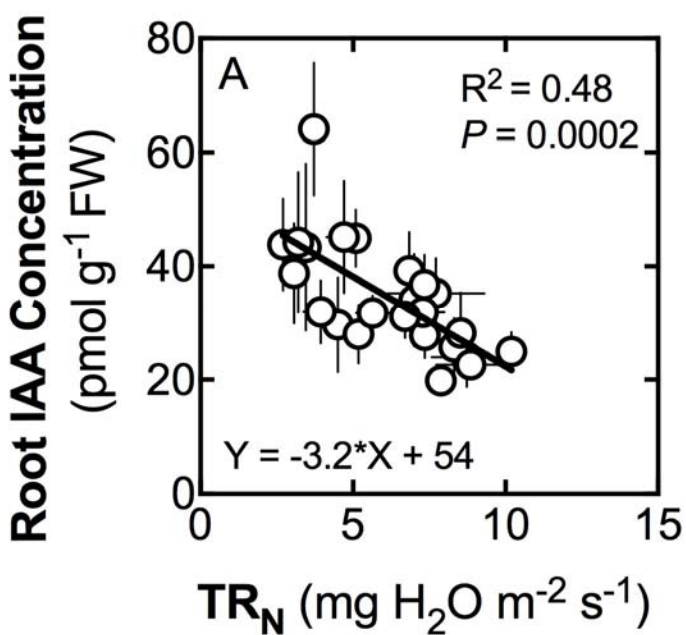

8



1 **TABLES**

2 **TABLE 1.** Summary of the experiments.

3

| Experiment | Sowing date | Measurement Date | Measured variable                      | Plant age (days) | Root medium | Growth period conditions ( $\pm$ S.E.) |                |                   |                |
|------------|-------------|------------------|----------------------------------------|------------------|-------------|----------------------------------------|----------------|-------------------|----------------|
|            |             |                  |                                        |                  |             | Daytime                                |                | Nighttime         |                |
|            |             |                  |                                        |                  |             | T ( $^{\circ}$ C)                      | VPD (kPa)      | T ( $^{\circ}$ C) | VPD (kPa)      |
| E1         | 28/04/15    | 02/06/15         | Hydraulic conductance                  | 36               | Potting mix | $27.6 \pm 0.4$                         | $2.6 \pm 0.10$ | $21.1 \pm 0.2$    | $1.4 \pm 0.03$ |
| E2         | 12/05/15    | 17/06/15         | Nighttime IAA and ABA, TR <sub>N</sub> | 37               | Hydroponic  | $28.4 \pm 0.5$                         | $2.8 \pm 0.12$ | $21.5 \pm 0.3$    | $1.4 \pm 0.03$ |
| E3.1       | 21/12/16    | 24/01/17         | Nighttime IAA and ABA, TR <sub>N</sub> | 34               | Hydroponic  | $25.8 \pm 0.1$                         | $1.6 \pm 0.03$ | $24.6 \pm 0.1$    | $1.7 \pm 0.02$ |
| E3.2       | 21/12/16    | 24/01/17         | Nighttime IAA and ABA, TR <sub>N</sub> | 34               | Hydroponic  | $25.8 \pm 0.1$                         | $1.6 \pm 0.03$ | $24.6 \pm 0.1$    | $1.7 \pm 0.02$ |
| E3.3       | 21/12/16    | 24/01/17         | Daytime IAA and ABA, TR                | 34               | Hydroponic  | $25.8 \pm 0.1$                         | $1.6 \pm 0.03$ | $24.6 \pm 0.1$    | $1.7 \pm 0.02$ |
| E4         | 07/05/14    | 12/06/14         | Leaf anatomical traits                 | 36               | Potting mix | $28.6 \pm 0.5$                         | $2.2 \pm 0.10$ | $22.8 \pm 0.3$    | $1.3 \pm 0.03$ |

4

5

6

7

1 **TABLE 2.** Environmental conditions during the measurements.

2  
3

| Experiment | TR measurement period* |            | Tissue sampling period <sup>4</sup> |                         |
|------------|------------------------|------------|-------------------------------------|-------------------------|
|            | T (°C)                 | VPD (kPa)  | T (°C)                              | VPD (kPa)               |
| E1         | 31.6 ± 0.1             | 2.7 ± 0.01 | 31.9 ± 0.1                          | 2.8 ± 0.02 <sub>6</sub> |
| E2         | 19.9 ± 0.1             | 1.3 ± 0.01 | 19.3 ± 0.1                          | 1.2 ± 0.01              |
| E3.1       | 24.7 ± 0.1             | 1.9 ± 0.01 | 24.2 ± 0.1                          | 2.0 ± 0.01 <sub>7</sub> |
| E3.2       | 24.5 ± 0.1             | 2.1 ± 0.01 | 24.4 ± 0.1                          | 2.1 ± 0.01              |
| E3.3       | 25.6 ± 0.2             | 2.2 ± 0.03 | 24.8 ± 0.1                          | 1.4 ± 0.06 <sub>8</sub> |

9  
10 \*Conditions during the one-hour transpiration rate measurement period, preceding tissue  
11 sampling for hydraulic conductance measurement (E1) or hormonal dosage (E2 and E3).

12  
13  
14  
15  
16  
17  
18  
19  
20  
21  
22  
23  
24  
25  
26
